# Supplementary material
Source: HighWire-hosted journal article supplement (http://jpet.aspetjournals.org/highwire/filestream/135601/field_highwire_adjunct_files/1/Sup__Fig__1_revised.pdf)
Supplement: Sup__Fig__1_revised.pdf [file Sup__Fig__1_revised.pdf]

## Supplemental figure 1

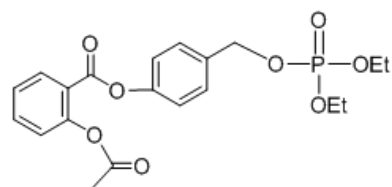

**phospho-aspirin (P-A)**  
**MDC-43**

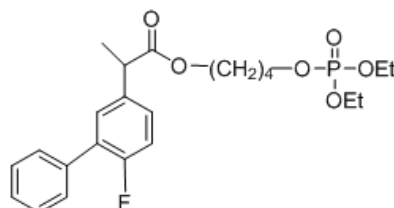

**phospho-flurbiprofen (P-F)**  
**OXT-813**

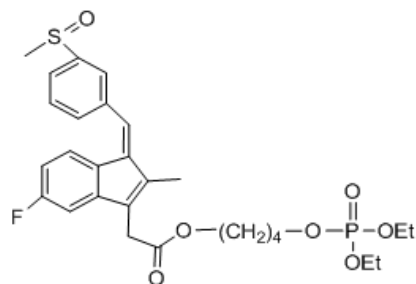

**phospho-sulindac (P-S)**  
**OXT-328**

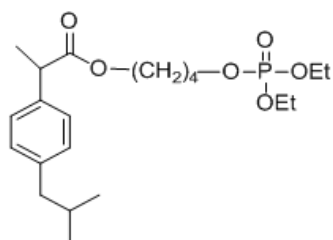

**phospho-ibuprofen (P-I)**  
**MDC-917**

### The chemical structures of the novel phospho-NSAIDs

All four compounds are derived from the corresponding NSAIDs by adding to their carboxylic group diethylphosphate through a linker molecule.

Article title: Oxidative stress mediates through apoptosis the anticancer effect of phospho-NSAIDs: Implications for the role of oxidative stress in the action of anticancer agents

Yu Sun, Liqun Huang, Gerardo G. Mackenzie, Basil Rigas

Journal: JPET
